# Supplementary material
Source: PubMed Central journal article supplement (PMC3365166)
Supplement: 1116670109_pnas.1116670109_SI.pdf [file 1116670109_pnas.1116670109_SI.pdf]

# Supporting Information

Piwonski et al. 10.1073/pnas.1116670109

## SI Methods

**On the Number of Enzyme Molecules within Vesicles.** We used a low concentration of enzyme molecules (0.5  $\mu\text{M}$ ) during the preparation of vesicles to ensure that most vesicles contained only a single molecule. To find out what the actual distribution of enzyme molecule numbers within vesicles was, we conducted the following experiment. We prepared vesicles in the presence of the usual concentration of HRP that contained also fluorescent resorufin molecules, which allowed us to observe the vesicles before adding the substrate (Amplex Red) and to count them. We then performed the standard experiment, as described in the main text, preceded by a photobleaching step that ensured that all resorufin molecules included in the vesicles in advance were destroyed. Counting the number of vesicles in which the signal increased due to enzymatic reaction, we found that they amounted to as many as 40% of the total vesicles. Using Poisson statistics, we calculated, based on this number, that 25–30% of the occupied vesicles might contain more than one enzyme molecule (mostly two). This number is slightly more than we would have expected based on the enzyme concentration used for vesicle preparation. However, it might only affect our conclusions favorably: it can partially explain why the correlation we see between initial velocity and plateau level is not higher than approximately 0.6.

## Kinetic Model

Given that the substrate concentration is in excess relative to the total enzyme concentration,  $[E]_T$ , one can make the following two approximations for the reaction shown in Scheme 1 of the main text:

$$[E]_T = [E] + [ES] + \{ESP\} \approx [E] + [ES] \quad \text{[S1]}$$

and

$$k_1[E][S] - (k_{-1} + k_c)[ES] = 0. \quad \text{[S2]}$$

It follows that product formation is determined by the following two coupled differential equations:

$$d[P]/dt = k_c[ES] \quad \text{[S3]}$$

$$d[ES]/dt = -k_2[ES][P] + k_{-2}[ESP]. \quad \text{[S4]}$$

By assuming that the term in Eq. S4 that corresponds to dissociation of ESP can be neglected, which will prove to be appropriate for the experimental results, and by then taking the derivative with respect to time of this equation, one obtains:

$$d^2 \ln[ES]/dt^2 = -k_2 d[P]/dt. \quad \text{[S5]}$$

Combining Eqs. S2 and S5 yields:

$$d^2 \ln[ES]/dt^2 = -k_2 k_c [ES]. \quad \text{[S6]}$$

Eq. S6 can be solved yielding:

$$[ES] = (C_1/2k_c k_2)(1 - \tanh^2(0.5(C_1(C_2 + t)^2)^{1/2})), \quad \text{[S7]}$$

where  $C_1$  and  $C_2$  are integration constants that are equal to  $2[E]_T k_c k_2$  and 0, respectively, as determined from the initial conditions that at time zero  $[ES] = [E]_T$  and  $d[ES]/dt = 0$ . Upon combining Eqs. S3 and S7 one, therefore, obtains:

$$d[P]/dt = k_c [E]_T (1 - \tanh^2(0.5(2[E]_T k_c k_2)^{1/2} t)). \quad \text{[S8]}$$

Integration of Eq. S8 yields:

$$[P] = (2k_c [E]_T / k_2)^{1/2} \tanh(0.5(2[E]_T k_c k_2)^{1/2} t). \quad \text{[S9]}$$

The experimental data can be fitted well to Eq. S9. A simulation of the full solution to Eq. S4 shows, however, that when  $k_{-2}$  is finite, but small compared to  $k_2$ , a continuous slow increase in P is expected at long times. The trace of Fig. 3A and similar traces show that such a slow increase barely exists, implying that  $k_2 \gg k_{-2}$ , as assumed above in relation to Eq. S4. According to Eq. S9, the concentration of P increases from 0 to a plateau value given by  $(2k_c [E]_T / k_2)^{1/2}$ . Given that the typical experimental plateau value is approximately 25 molecules, it follows that the value of  $k_c / k_2$  is approximately 300, which shows that also  $k_c \gg k_{-2}$ .
